# Supplementary material for: Probiotics for the prevention of antibiotic-associated adverse events in children—A scoping review to inform development of a core outcome set
Source: PubMed Central journal article supplement (PMC7259577; doi:10.1371/journal.pone.0228824), 2020-05-29
Supplement: pone.0228824.s001.pdf [file pone.0228824.s001.pdf]

**Supplementary Figure 1.** Risk of bias summary for the included studies.

|                   | Random sequence generation (selection bias) | Allocation concealment (selection bias) | Blinding (performance bias and detection bias) | Incomplete outcome data (attrition bias) | Selective reporting (reporting bias) | Other bias |
|-------------------|---------------------------------------------|-----------------------------------------|------------------------------------------------|------------------------------------------|--------------------------------------|------------|
| Ahmad 2013        | ?                                           | ?                                       | +                                              | +                                        | +                                    | ?          |
| Akcam 2015        | -                                           | -                                       | -                                              | +                                        | ?                                    | ?          |
| Arvola 1999*      | +                                           | ?                                       | +                                              | -                                        | ?                                    | +          |
| Basnet 2017       | -                                           | -                                       | -                                              | +                                        | ?                                    | ?          |
| Bin 2015          | ?                                           | ?                                       | -                                              | +                                        | ?                                    | ?          |
| Correa 2005*      | ?                                           | ?                                       | +                                              | ?                                        | ?                                    | ?          |
| Dharani 2017*     | ?                                           | ?                                       | ?                                              | +                                        | ?                                    | ?          |
| Erdeve 2004*      | +                                           | ?                                       | ?                                              | -                                        | ?                                    | ?          |
| Esposito 2018*    | ?                                           | ?                                       | ?                                              | +                                        | ?                                    | ?          |
| Fox 2015*         | +                                           | +                                       | +                                              | +                                        | +                                    | +          |
| Georgieva 2015*   | +                                           | +                                       | +                                              | ?                                        | +                                    | -          |
| Hurdic 2009       | +                                           | +                                       | -                                              | +                                        | ?                                    | ?          |
| Jindal 2017*      | ?                                           | ?                                       | -                                              | +                                        | ?                                    | +          |
| Jirapinyo 2002*   | ?                                           | ?                                       | ?                                              | ?                                        | ?                                    | ?          |
| Korpela 2016      | +                                           | ?                                       | +                                              | ?                                        | ?                                    | +          |
| Kotowska 2005*    | +                                           | +                                       | +                                              | +                                        | ?                                    | ?          |
| Kołodziej 2018*   | +                                           | +                                       | +                                              | +                                        | +                                    | +          |
| Lionetti 2006     | +                                           | +                                       | +                                              | +                                        | ?                                    | +          |
| Merenstein 2009*  | ?                                           | ?                                       | +                                              | +                                        | +                                    | +          |
| Okazaki 2016      | +                                           | +                                       | ?                                              | ?                                        | ?                                    | ?          |
| Olek 2017*        | +                                           | +                                       | +                                              | +                                        | +                                    | -          |
| Plewińska 2006    | -                                           | ?                                       | ?                                              | +                                        | ?                                    | +          |
| Ranasinghe 2008   | ?                                           | -                                       | -                                              | +                                        | ?                                    | ?          |
| Ruszczynski 2008* | +                                           | +                                       | +                                              | +                                        | ?                                    | +          |
| Seki 2003         | -                                           | -                                       | -                                              | +                                        | ?                                    | ?          |
| Shahraki 2017     | +                                           | -                                       | -                                              | +                                        | +                                    | ?          |
| Shan 2013*        | +                                           | +                                       | -                                              | -                                        | ?                                    | ?          |
| Sykora 2005*      | +                                           | +                                       | +                                              | +                                        | ?                                    | +          |
| Szajewska 2009*   | +                                           | +                                       | +                                              | -                                        | ?                                    | +          |
| Szymański 2008*   | +                                           | +                                       | +                                              | +                                        | ?                                    | ?          |
| Tankanow 1990*    | ?                                           | ?                                       | -                                              | -                                        | ?                                    | -          |
| Tolone 2012       | ?                                           | -                                       | -                                              | +                                        | ?                                    | ?          |
| Vanderhoof 1999*  | +                                           | ?                                       | +                                              | +                                        | ?                                    | ?          |
| Wang 2014         | +                                           | -                                       | -                                              | +                                        | ?                                    | ?          |
| Zakordonets 2016* | +                                           | ?                                       | -                                              | +                                        | ?                                    | -          |
| Zoppi 2001        | ?                                           | -                                       | -                                              | ?                                        | ?                                    | +          |

\*studies with the risk of bias assessment derived from the recent Cochrane review
